# Supplementary material for: A pH-sensitive nanoagent self-assembled from a highly negatively-charged phthalocyanine with excellent biosafety for photothermal therapy
Source: Royal Society of Chemistry journal article supplement (doi:10.1039/d0tb02981e), 2021-01-01
Supplement: d0tb02981e1.pdf [file d0tb02981e1.pdf]

## Supporting Information for

### **A pH-sensitive nanoagent self-assembled from a highly negative-charged phthalocyanine with excellent biosafety for photothermal therapy**

Bing-De Zheng, Zhen-Liang Huang, Li-Li Lv, Wen-Liang Lan, Jia-Qian Hu, Xingshu Li, Bi-Yuan Zheng, Mei-Rong Ke\*, and Jian-Dong Huang\*

College of Chemistry, State Key Laboratory of Photocatalysis on Energy and Environment, Fujian Provincial Key Laboratory of Cancer Metastasis Chemoprevention and Chemotherapy, Fuzhou University, Fuzhou 350116, China.

\* Corresponding author. Tel: +86-591-22865513; Fax: +86-591-22866227; E-mail: kemeirong@fzu.edu.cn (M.-R. Ke), jdhuang@fzu.edu.cn (J.-D. Huang)

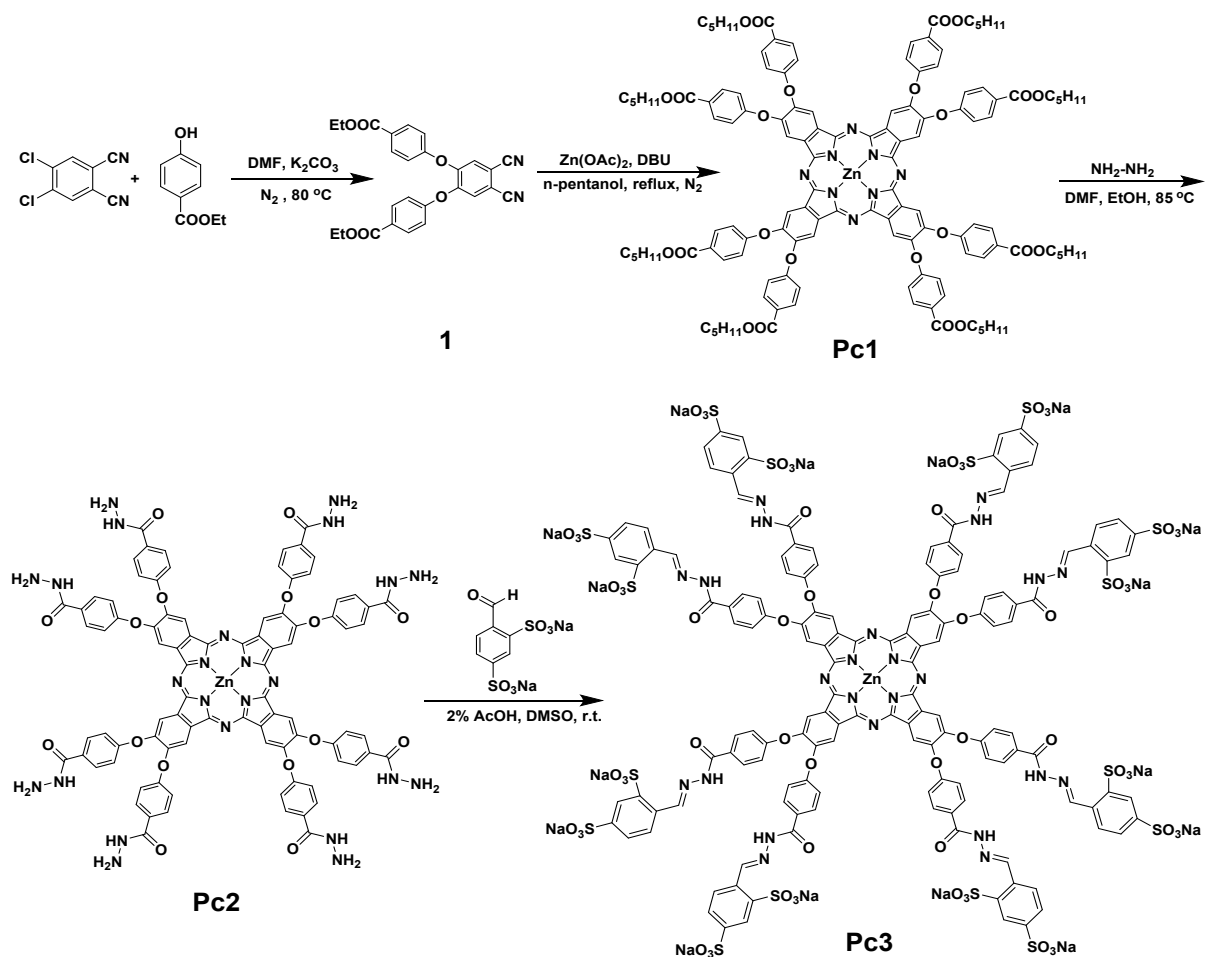

Scheme S1. Synthetic route of **Pc3**.

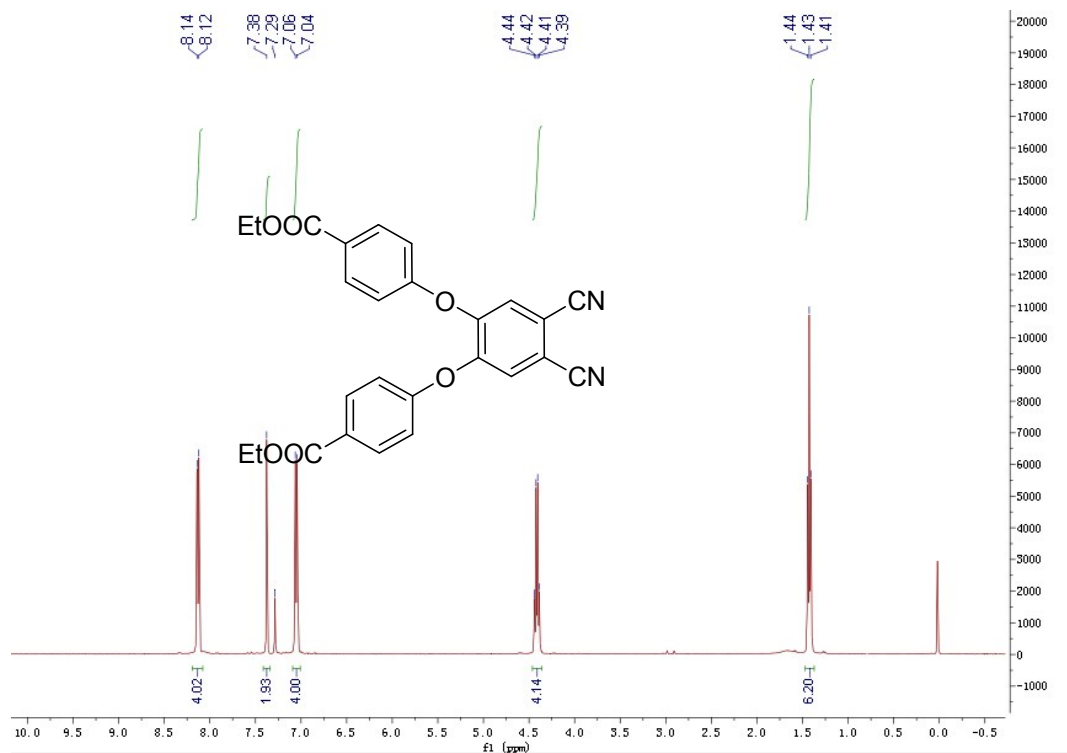

Fig. S1.  $^1\text{H}$  NMR spectrum of **1** in  $\text{CDCl}_3$ .

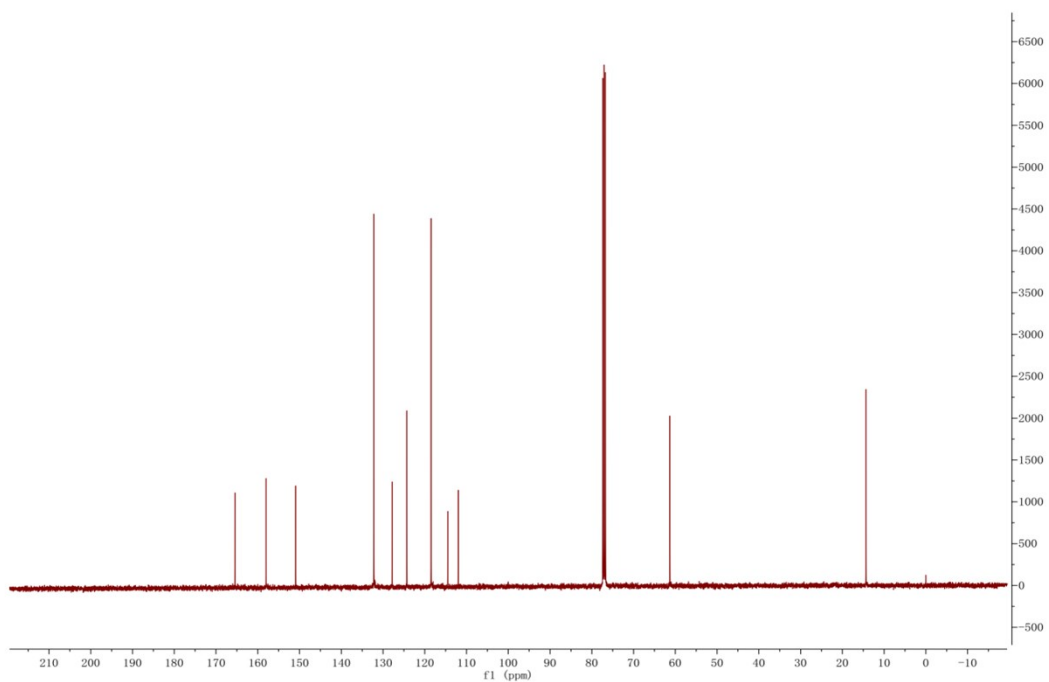

**Fig. S2.**  $^{13}\text{C}$  NMR spectrum of **1** in  $\text{CDCl}_3$ .

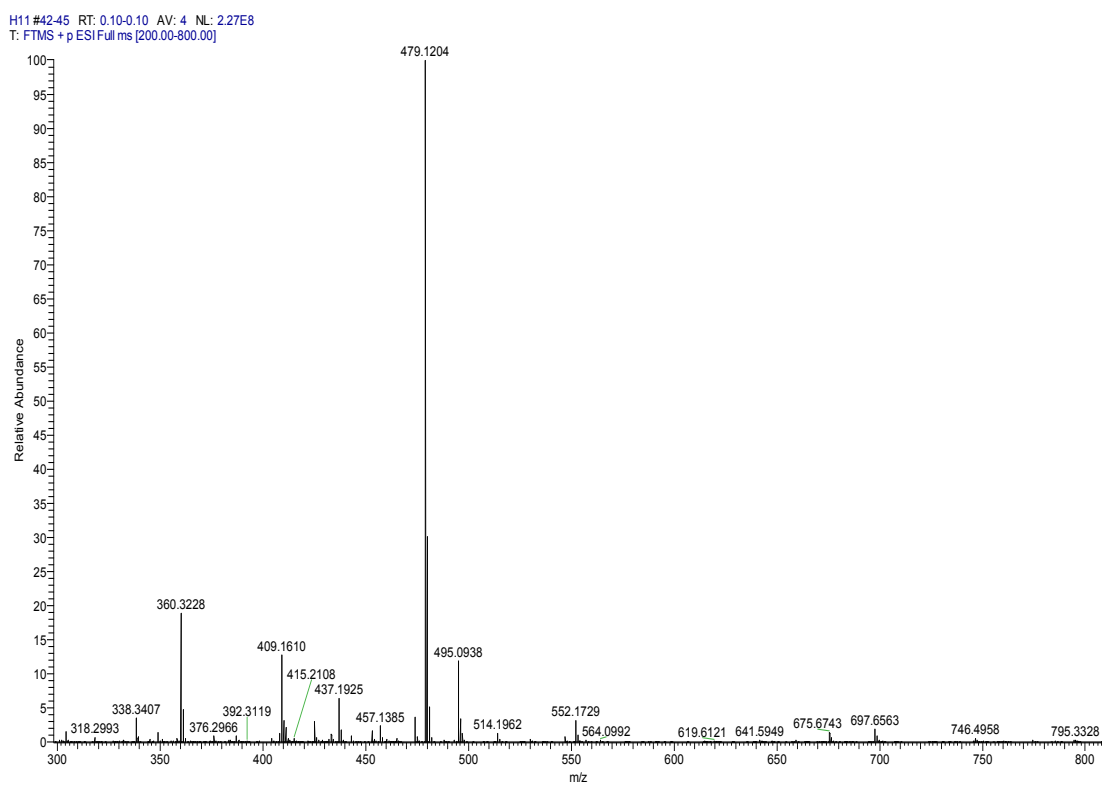

**Fig. S3.** HRMS spectrum of **1**.

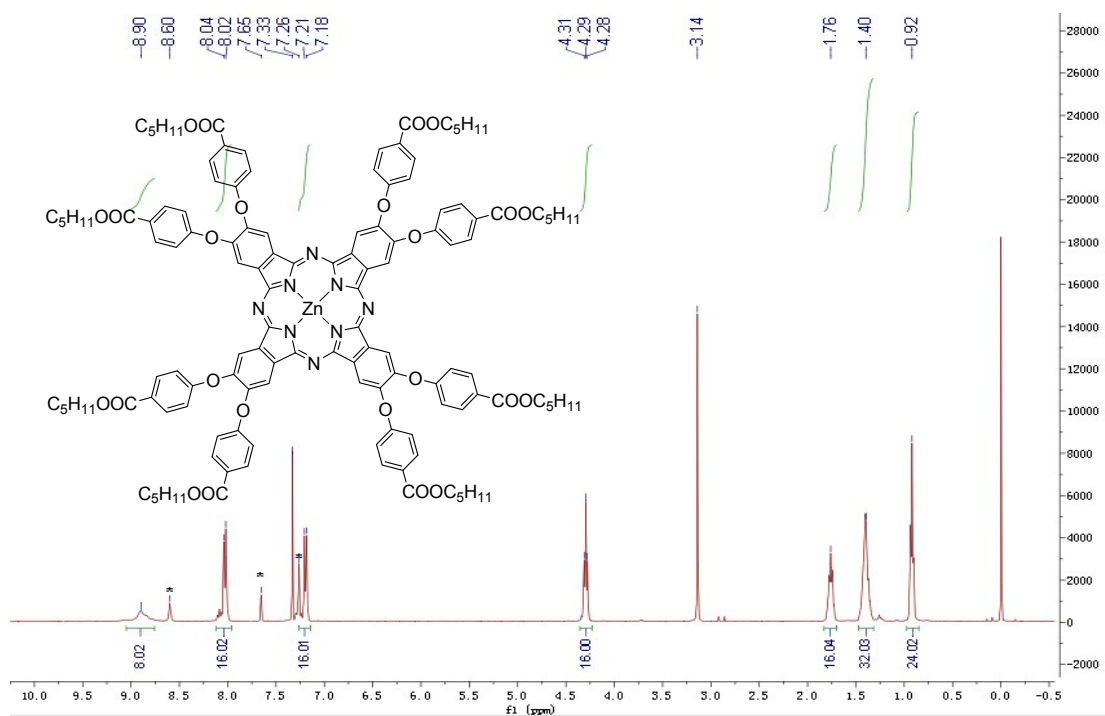

**Fig. S4.**  $^1\text{H}$  NMR spectrum of **Pc1** in  $\text{CDCl}_3 + \text{pyridine-}d_5$ .

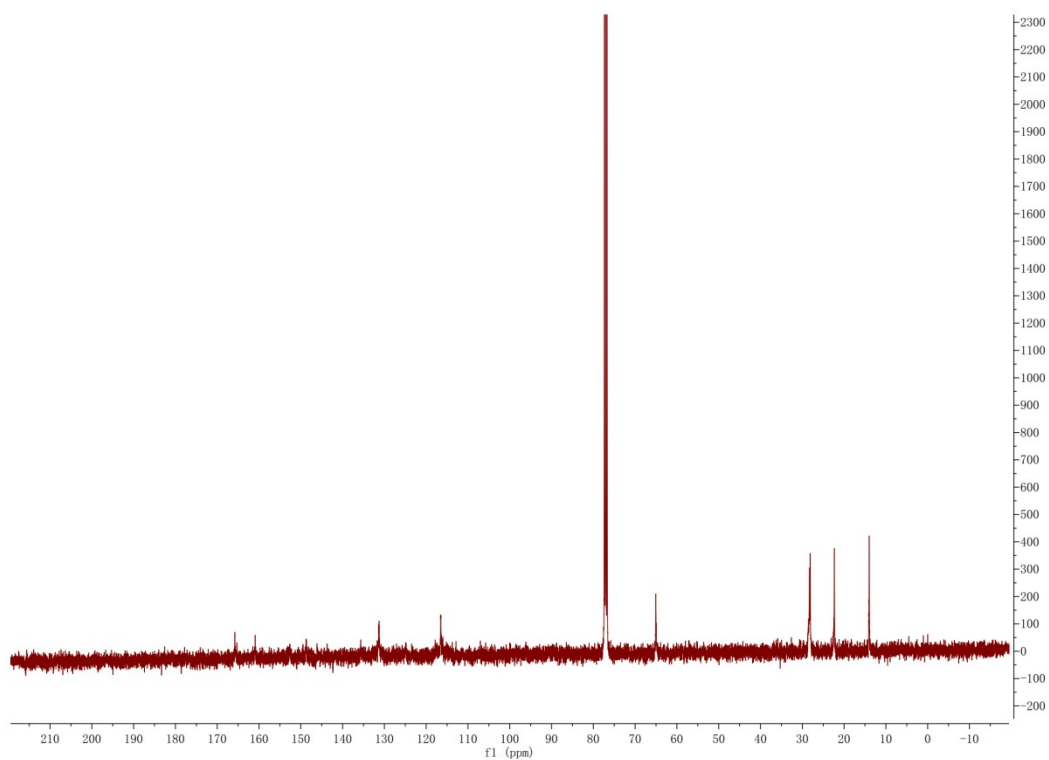

**Fig. S5.**  $^{13}\text{C}$  NMR spectrum of **Pc1** in  $\text{CDCl}_3$ .

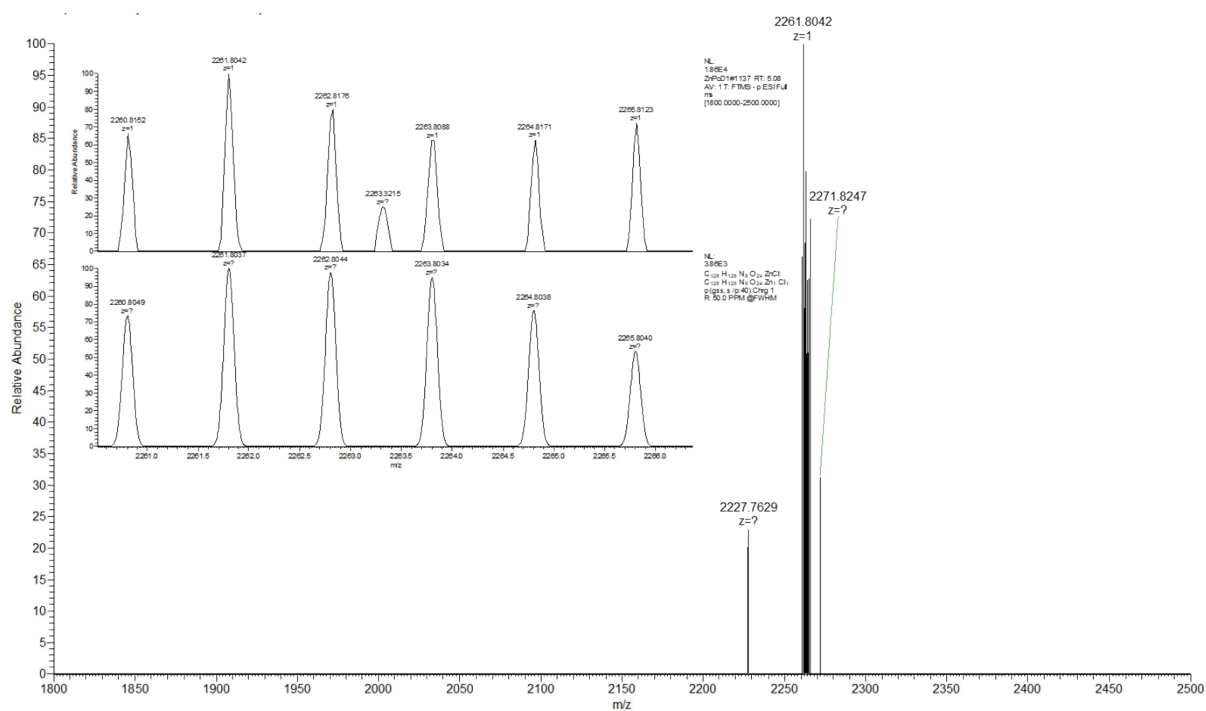

Fig. S6. HRMS spectrum of Pc1.

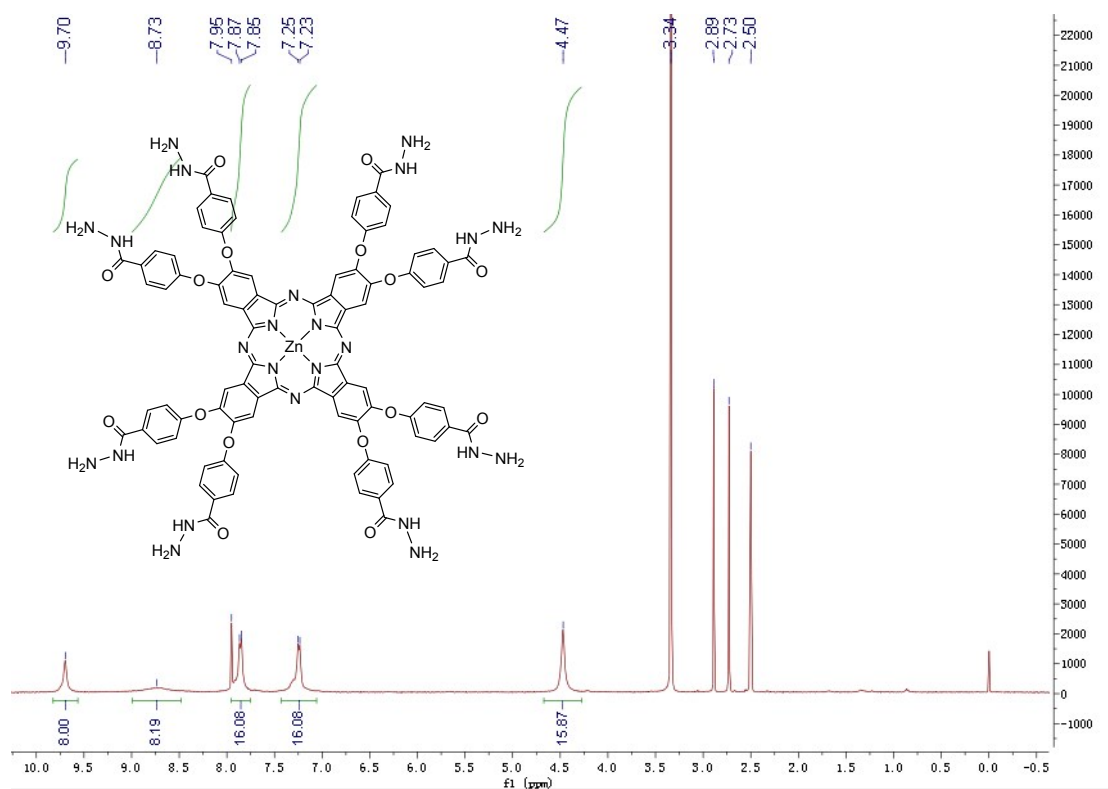

Fig. S7. <sup>1</sup>H NMR spectrum of Pc2 in DMSO-*d*<sub>6</sub>.

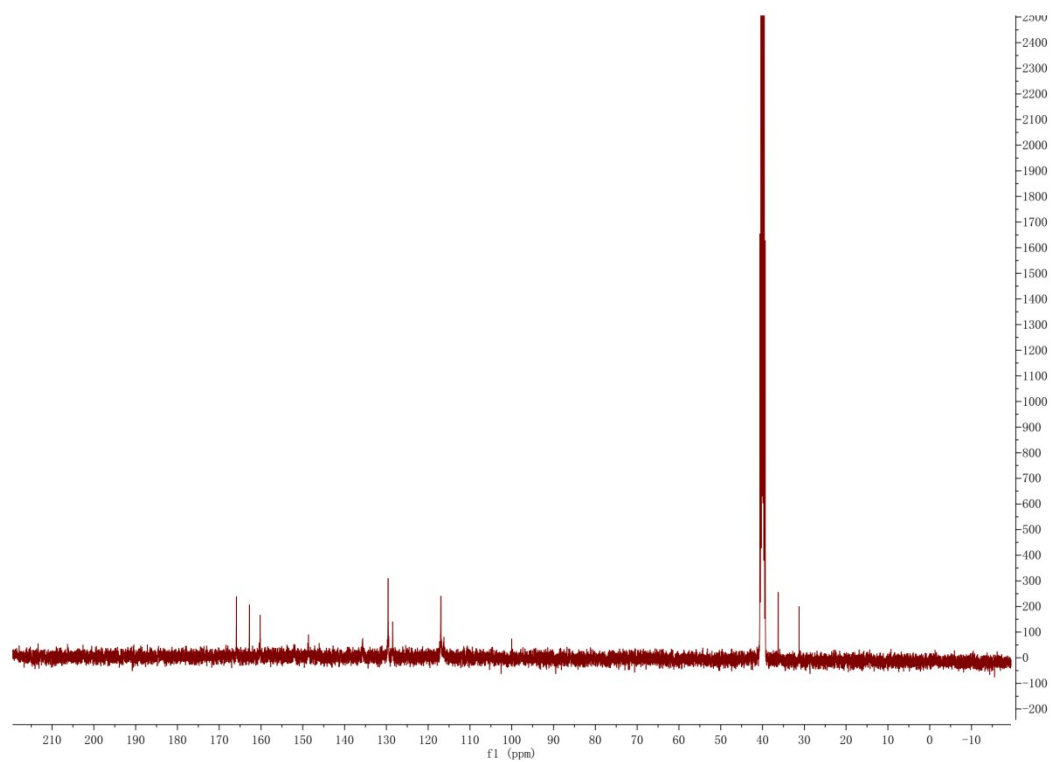

Fig. S8. <sup>13</sup>C NMR spectrum of Pc2 in DMSO-d<sub>6</sub>.

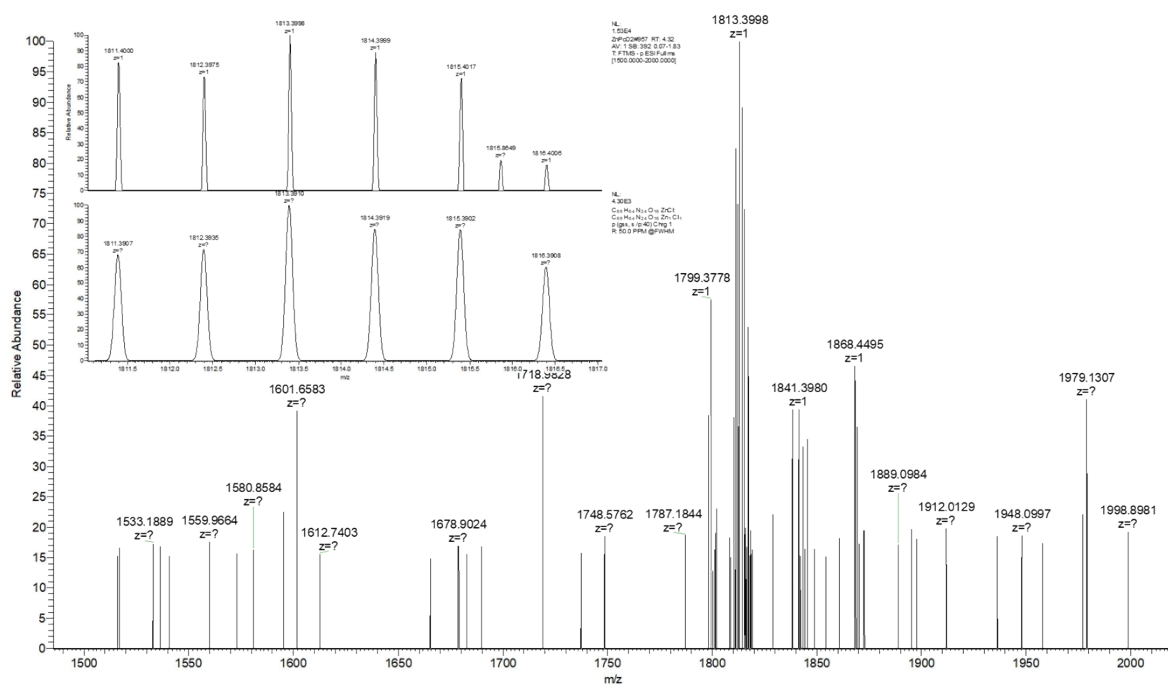

Fig. S9. HRMS spectrum of Pc2.

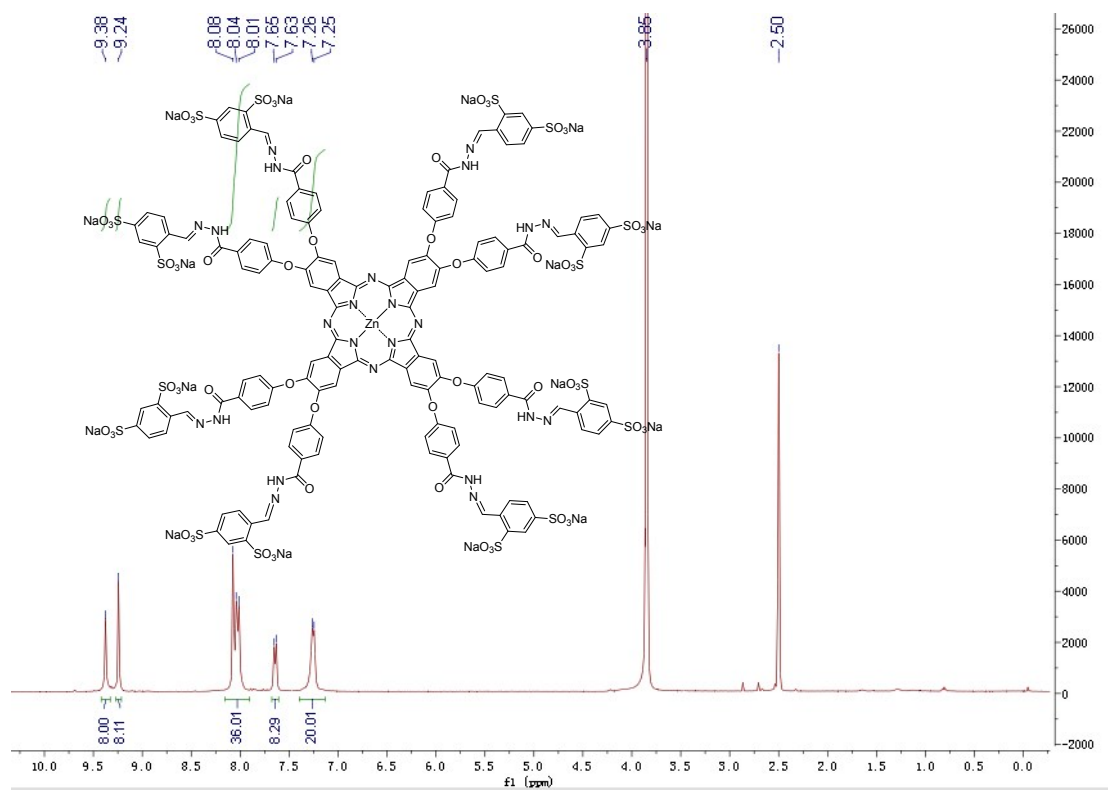

**Fig. S10.** <sup>1</sup>H NMR spectrum of Pc3 (DMSO-*d*<sub>6</sub> + D<sub>2</sub>O).

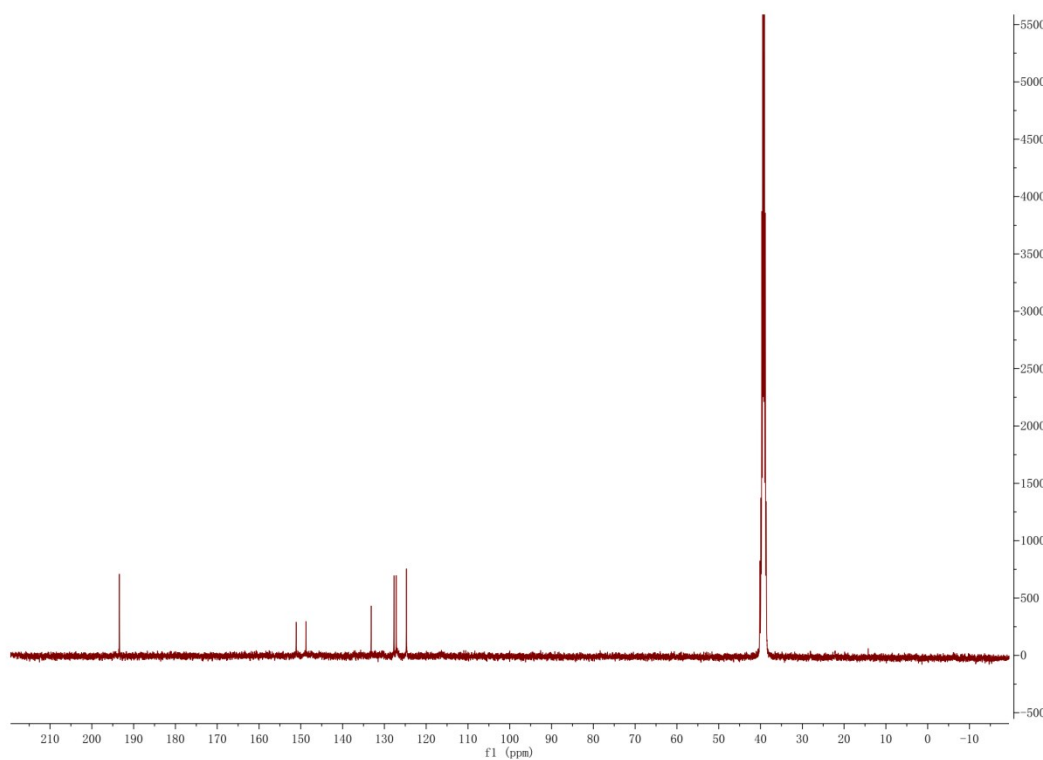

**Fig. S11.** <sup>13</sup>C NMR spectrum of Pc3 in DMSO-*d*<sub>6</sub>.

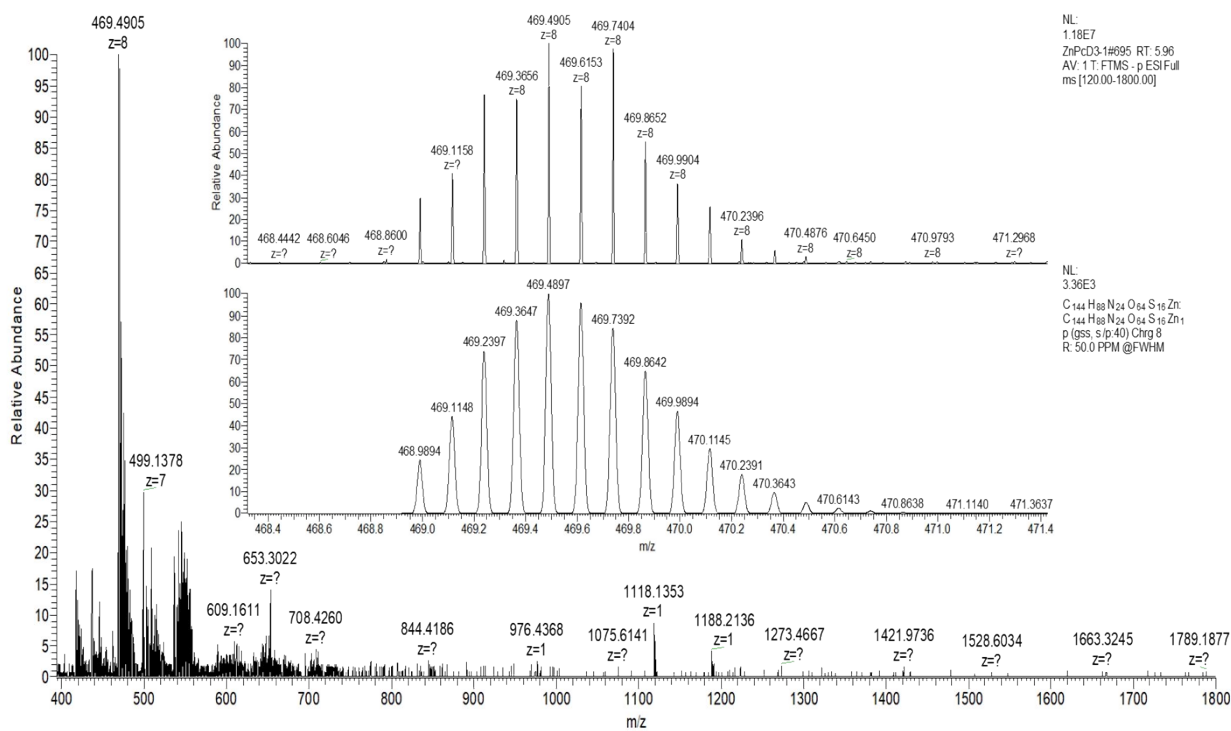

**Fig. S12.** HRMS spectrum of Pc3.

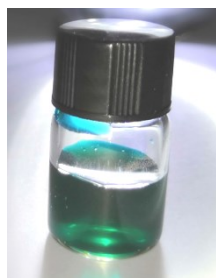

**Fig. S13.** Pc3 aqueous solution with a concentration of 8 mg mL<sup>-1</sup>.

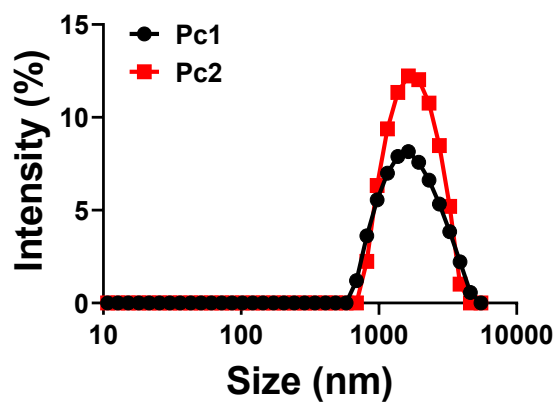

**Fig. S14.** Size distribution of Pc1 and Pc2 in H<sub>2</sub>O detected by DLS (both at 5 μM, self-assembled for 12 h and stored in 4 °C).



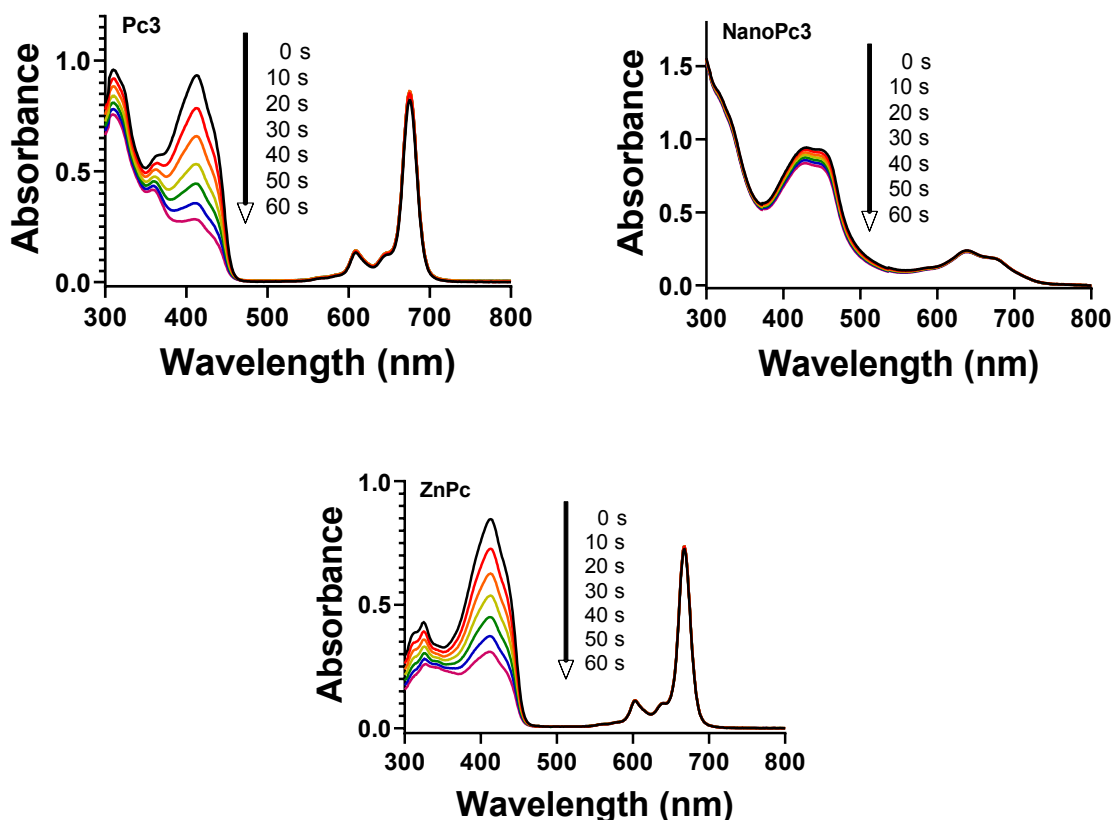

**Fig. S15.**  $^1\text{O}_2$  generation kinetics of **Pc3** and **ZnPc** in DMF and **NanoPc3** in  $\text{H}_2\text{O}$  ( $5 \mu\text{M}$ ) ( $n = 3$ ). 1, 3-diphenylisobenzofuran (DPBF) was used as a probe.  $A_0$  and  $A$  are absorbance of DPBF at initial time and different irradiation time points ( $\lambda > 610 \text{ nm}$ ), respectively.

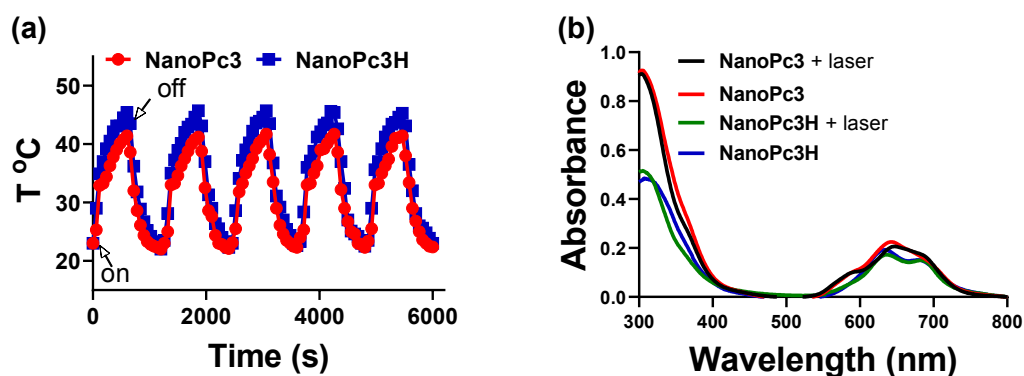

**Fig. S16.** (a) Temperature change curves of **NanoPc3** and **NanoPc3H** solutions ( $10 \mu\text{M}$ ) in water over five cycles of on/off laser irradiation ( $730 \text{ nm}$ ,  $0.52 \text{ W cm}^{-2}$ ). (b) Absorption spectra of **NanoPc3** and **NanoPc3H** solutions ( $10 \mu\text{M}$ ) in water before and after  $730 \text{ nm}$  laser irradiation ( $0.52 \text{ W cm}^{-2}$ ,  $1 \text{ h}$ ).

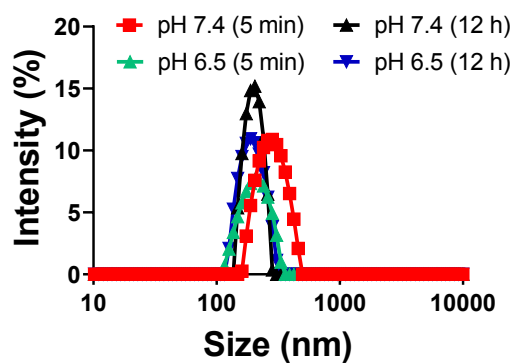

**Fig. S17.** Size distribution of **NanoPc3** in PBS at pH 7.4 and pH 6.5 at different time points, detected by DLS.

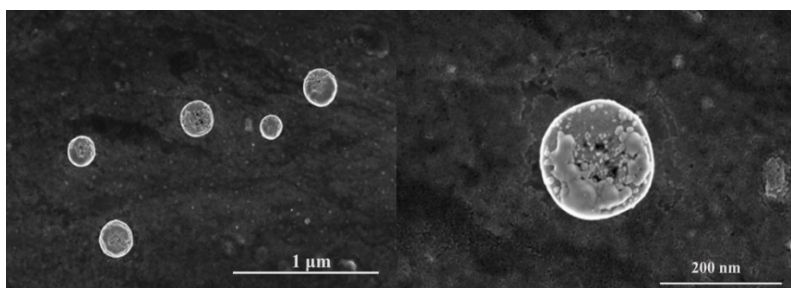

**Fig. S18.** TEM images of **NanoPc3H**.

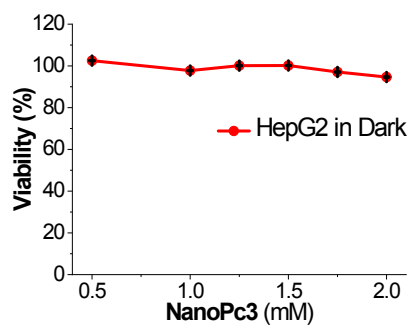

**Fig. S19.** Cytotoxicity of **NanoPc3** against HepG2 cells in the dark.

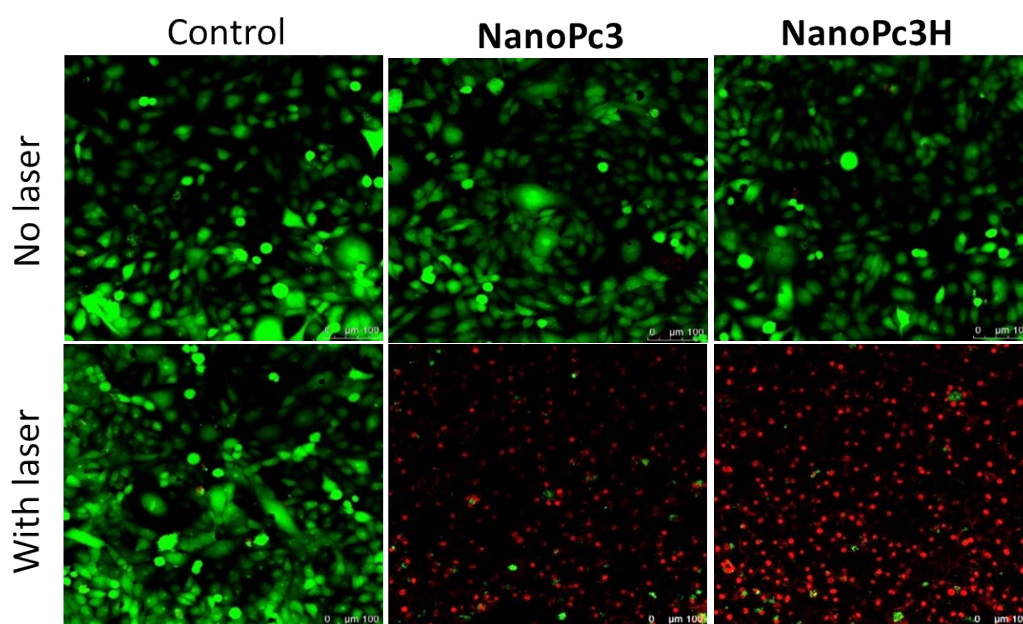

**Fig. S20.** Fluorescence images of HepG2 cells after incubation with NanoPc3 or NanoPc3H (both at 4  $\mu\text{M}$ ) for 2 h in the absence of presence of laser irradiation ((laser: 730 nm,  $0.52 \text{ W cm}^{-2}$ , 5 min), and then costained with Calcein-AM (green fluorescence) and propidium iodide (PI) (red fluorescence). Scale bar: 100  $\mu\text{M}$ .

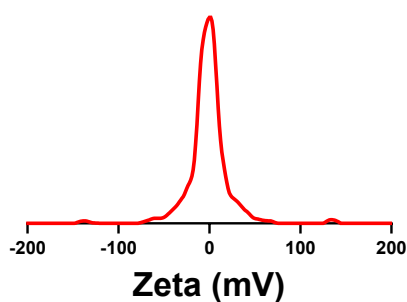

**Fig. S21.** Zeta potential of NanoPc3 extracted from tumor tissues after intratumoral injection for 8 h.

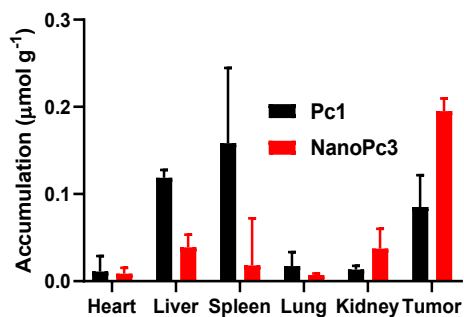

**Fig. S22.** Tissue distribution of NanoPc3 and Pc1 in the mice, measured through an *ex vivo* extraction method at 8 h post-injection. (n = 3)

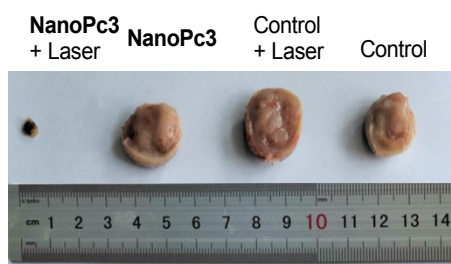

**Fig. S23.** Representative tumor images excised from the mice at 14 day post-treatments. (n = 5)
